# Supplementary material
Source: Springer Nature journal article supplement (https://www.springermedizin.de/resource/supplementary/12876_2012_792_MOESM1_ESM.pdf/9437496)
Supplement: MOESM1 [file 9437496]

Recruited

Female controls = 330

Pregnant Women = 510

Exclusion Criteria

24 (23 GI-surgery, 1 M. Crohn)

16 (all GI-surgery)

Missing Questionnaires

1

86\*

Included

305

408
